# Supplementary material for: The intrinsic conformational features of amino acids from a protein coil library and their applications in force field development
Source: Royal Society of Chemistry journal article supplement (doi:10.1039/c2cp43633g), 2012-12-12
Supplement: c2cp43633g.pdf [file c2cp43633g.pdf]

**The intrinsic conformational features of amino acids from a protein coil library  
and their applications in force field development**

Fan Jiang, Wei Han and Yun-Dong Wu

There is no supplementary material associated with the manuscript.  
The necessary files for the implementation of the OPLS-AA/C force field will be  
provided upon request.
